# Supplementary material
Source: Springer Nature journal article supplement (https://www.springermedizin.de/resource/supplementary/12872_2013_648_MOESM1_ESM.pdf/9430194)
Supplement: MOESM1 [file 9430194]

The Tromsø Study 1994/-95, Phase 1:  
All inhabitants of the municipality of  
Tromsø > 25 years were invited

27.158 subjects attended  
(77 % of the invited)

The Tromsø Study 1994/-95, Phase 2:

All participants aged 55-75 years and 5-10 %  
of all other age groups  $\geq$  25 years invited

9057 invited, 6862 consented and attended  
(75% of the invited)

506 individuals excluded  
due to previous myocardial  
infarction (402) or stroke (190)  
or both (86)

308 individuals excluded  
due to the presence of diabetes\*

348 individuals had missing  
values for serum uric acid

5700 individuals; 2696 men, 3004 women

Number of endpoints:

659 myocardial infarctions, 430 ischemic  
strokes, and 1433 deaths from all causes
